# Supplementary material for: Fast Screening of Inhibitor Binding/Unbinding Using Novel Software Tool CaverDock
Source: PubMed Central journal article supplement (PMC6828983; doi:10.3389/fchem.2019.00709), 2019-10-29
Supplement: Data_Sheet_1.pdf [file Data_Sheet_1.pdf]

## ***Supporting Information***

### ***Fast Screening of Inhibitor Binding/Unbinding using Novel Software Tool CaverDock***

**Gaspar P. Pinto<sup>1,2,#</sup>, Ondrej Vavra<sup>1,2,#</sup>, Jiri Filipovic<sup>3</sup>, Jan Stourac<sup>1,2</sup>, David Bednar<sup>1,2,\*</sup>, Jiri Damborsky<sup>1,2,\*</sup>**

<sup>1</sup> Loschmidt Laboratories, Department of Experimental Biology and RECETOX, Faculty of Science, Masaryk University, Brno, Czech Republic

<sup>2</sup> International Centre for Clinical Research, St. Anne's University Hospital Brno, Brno, Czech Republic

<sup>3</sup> Institute of Computer Science, Faculty of Science, Masaryk University, Brno, Czech Republic

# These authors contributed equally to this work.

\* Correspondence: David Bednar, 222755@mail.muni.cz; Jiri Damborsky, jiri@chemi.muni.cz

Here we present the details for the protein dataset used for the simulation with flexible side chains. Furthermore, we present the tables and plots for the dataset used to compare the results from CaverDock with laboratory experiments. We then present the plots with the results obtained from the CaverDock continuous trajectory calculations for the three tunnels of the cytochrome P450 17A1 and two tunnels of the leukotriene A4 hydrolase/aminopeptidase. We also show radius changes along the tunnel obtained by Caver. Finally, we present the root mean square deviations for every finished CaverDock calculation (lower bound and continuous trajectory) and compare them with the results obtained with the AutoDock Vina.

Attached electronic supplementary material files works with most of the browsers except Chrome, which does not allow running external scripts, that is essential for 3D visualization using JSmol. Electronic supplementary material is available also from this web site and works for all browsers:

[https://loschmidt.chemi.muni.cz/data/caverdock/pinto\\_2019\\_suppl/](https://loschmidt.chemi.muni.cz/data/caverdock/pinto_2019_suppl/)

## Details on the proteins used for the simulations with flexible side chains:

Acetylcholinesterase AChE plays an important role in cholinergic synapses for both the peripheral and central nervous systems. These synapses terminate the transmission of impulses by hydrolyzing the natural substrate acetylcholine. The first generation of Alzheimer drugs specifically targeted this enzyme. As cholinergic neurons are widespread across animals, anti-AChE have also been used as pesticides, agricultural insecticides and even nerve gases in warfare (Čolović et al., 2013; Silman and Sussman, 2005). We used enzyme-inhibitor complex PDB-ID 2XI4 (Sanson et al., 2011) for this work. As for the other enzymes, we deleted the inhibitor from the structure before starting the CaverDock protocol.

Cholesteryl ester transfer protein CETP controls the transport of cholesteryl ester from high-density lipoproteins (HDLs) to low and very low-density lipoproteins (LDLs and VLDLs) (Geller and Billiar, 1998). High concentrations of LDLs and VLDLs and low concentrations of HDLs are considered to be good predictors of cardiovascular risks. Inhibition of CETP is being considered as a novel approach to prevent these risks (Cannon, 2011; Dullaart et al., 2007; Joy and Hegele, 2008). The structure PDB-ID 4EWS (Liu et al., 2012) was used, which is a complex with the drug Torcetrapib. CETP was the only protein with a channel considered: the substrate enters on one side of the protein, travels into the active site and the products exit through another side of the protein.

Nitric oxide synthase iNOS synthesizes nitric oxide from L-arginine. Its excess has been implicated in inflammatory bowel disease, rheumatoid arthritis, stroke thrombosis and general inflammation (Bian and Murad, 2003; Duncan and Heales, 2005; Nathan, 2004). The structure of iNOS was that of PDB-ID 3EBF (Garcin et al., 2008) complexed with inhibitor (3R)-3-[(1,2,3,4-tetrahydroisoquinolin-7-yl)oxy)methyl]-2,3-dihydrothieno[2,3-f][1,4]oxazepin-5-amine, with code name 332.

Metal-dependent deacetylase LpxC is a zinc-dependent metalloprotein that promotes the deacetylation of UDP-3-O-N-acetylglucosamine, which is an essential step in the biosynthesis of lipid A. Inhibitors of this enzyme have been studied as potentially new antibiotic targets to combat the increase in multi-drug resistant bacteria. Although some narrow spectrum inhibitors have been approved by the FDA, broad spectrum antibiotic inhibitors have only been approved already during in this decade last ten years (Arolas et al., 2011). LpxC inhibitors represent a class of antibiotics that act not by killing bacteria but by downregulating hindering instead their ability of bacteria to start phagocytosis and thus to induce sepsis (Chemonges, 2014; Tomaras et al., 2014; Whittington et al., 2003). We used the structure PDB-ID 3NZK (Cole et al., 2011) complexed with the inhibitor with inhibitor N-((1S,2R)-2-hydroxy-1-[(hydroxyamino)carbonyl]propyl)-4-[[4-(morpholin-4-ylmethyl)phenyl]ethynyl]benzamide, with code name C90.

Matrix metalloproteinase-13 MMP-13 is a metalloprotein with similar motif to leukotriene HEXXH. However, MMP-13 has a longer motif present in the superfamily of endopeptidases, HEXXHXXGXXH (Stöcker and Bode, 1995). MMP13 belongs to the collagenase subfamily. It is the most active protein of the subfamily in cleaving collagen, making it a preferred target for the design of inhibitors to combat osteoarthritis (Wasserman, 2005). We used the structure PDB-ID 1XUD (Engel et al., 2005), which was complexed with inhibitor N,N'-bis(4-fluoro-3-methylbenzyl)pyrimidine-4,6-dicarboxamide, with code name PB4.

**Supplementary Table S1.** Root mean square deviation (RMSD) values for the structural analysis of HOLO dataset.

| Complex     | PDB ID | RMSD (Å) of closest conformation to bound inhibitors | RMSD (Å) of lowest energy conformations |
|-------------|--------|------------------------------------------------------|-----------------------------------------|
| compound_01 | 2VCI   | 0.86                                                 | 1.25                                    |
| compound_02 | 2UWD   | 0.67                                                 | 0.67                                    |
| compound_03 | 2BSM   | 0.60                                                 | 0.60                                    |
| compound_04 | 5NYI   | 0.60                                                 | 2.01                                    |
| compound_05 | 5J2X   | 0.83                                                 | 1.98                                    |
| compound_06 | 6F1N   | 0.81                                                 | 1.87                                    |
| compound_07 | 6ELO   | 0.31                                                 | 0.31                                    |
| compound_08 | 5J64   | 0.54                                                 | 1.56                                    |
| compound_10 | 6ELN   | 0.49                                                 | 0.49                                    |
| compound_11 | 5J20   | 0.50                                                 | 8.30                                    |
| compound_12 | 5J86   | 0.46                                                 | 0.49                                    |
| compound_13 | 5J9X   | 0.66                                                 | 0.67                                    |
| compound_14 | 6ELP   | 0.26                                                 | 0.29                                    |
| compound_15 | 5J27   | 0.41                                                 | 0.45                                    |
| compound_17 | 5LRZ   | 3.14                                                 | 3.58                                    |
| compound_18 | 5LR7   | 9.83                                                 | 9.88                                    |
| compound_19 | 2YKI   | 2.65                                                 | 9.57                                    |
| compound_20 | 5LQ9   | 0.80                                                 | 0.84                                    |
| compound_21 | 5LS1   | 0.84                                                 | 1.12                                    |
| compound_22 | 5T21   | 0.94                                                 | 1.31                                    |
| compound_35 | 6EYA   | 1.08                                                 | 1.08                                    |
| compound_36 | 5LO6   | 0.61                                                 | 0.61                                    |
| compound_37 | 5LNZ   | 1.10                                                 | 1.31                                    |
| compound_38 | 6EY8   | 1.15                                                 | 5.49                                    |
| compound_40 | 6EY9   | 0.39                                                 | 1.29                                    |
| compound_43 | 5OCI   | 1.26                                                 | 1.51                                    |
| compound_50 | 5ODX   | 1.07                                                 | 1.10                                    |
| compound_51 | 5NYH   | 0.44                                                 | 0.44                                    |
| compound_60 | 5OD7   | 0.48                                                 | 0.51                                    |
| compound_62 | 6EI5   | 0.44                                                 | 0.77                                    |
| compound_67 | 5LR1   | 0.42                                                 | 0.42                                    |
| compound_68 | 6EL5   | 0.48                                                 | 1.71                                    |
| compound_69 | 5LO5   | 1.13                                                 | 1.13                                    |
| compound_70 | 2YKJ   | 1.61                                                 | 9.32                                    |

**Supplementary Table S2.** Improvement in root mean square deviation (RMSD) by using extended tunnel radius.

| Analysed case | Default settings |                     | Extended tunnel radius |                     |
|---------------|------------------|---------------------|------------------------|---------------------|
|               | Lowest RMSD (Å)  | Low Energy RMSD (Å) | Lowest RMSD (Å)        | Low Energy RMSD (Å) |
| compound_11   | 0.50             | 8.30                | 0.57                   | 7.99                |
| compound_18   | 9.83             | 9.88                | 1.27                   | 2.18                |
| compound_19   | 2.65             | 9.57                | 1.81                   | 2.26                |
| compound_38   | 1.15             | 5.49                | 0.43                   | 5.59                |
| compound_70   | 1.61             | 9.32                | 0.31                   | 0.31                |

**Supplementary Table S3.** CoverDock energies for the HOLO dataset.

| Ligand      | E <sub>bound</sub> | E <sub>surface</sub> | ΔE <sub>BS</sub> | k <sub>off</sub> [s <sup>-1</sup> ] | K <sub>D</sub> [M <sup>-1</sup> ] | k <sub>on</sub> [M <sup>-1</sup> s <sup>-1</sup> ] | log(k <sub>off</sub> ) | log(K <sub>D</sub> ) | log(k <sub>on</sub> ) | t <sub>comp</sub> [ns] | 1 / k <sub>off</sub> | log(1/k <sub>off</sub> ) |
|-------------|--------------------|----------------------|------------------|-------------------------------------|-----------------------------------|----------------------------------------------------|------------------------|----------------------|-----------------------|------------------------|----------------------|--------------------------|
| compound_02 | -8.6               | -3.10                | -5.5             | 0.0021                              | 3.5E-09                           | 580000                                             | -2.68                  | -8.4559              | 5.7634                | 2.6                    | 476.1905             | 2.6778                   |
| compound_03 | -8.9               | -4.20                | -4.7             | 0.01                                | 0.000000011                       | 970000                                             | -2.00                  | -7.9586              | 5.9868                | 2.2                    | 100.0000             | 2.0000                   |
| compound_05 | -7.9               | -3.50                | -4.4             | 0.014                               | 2.66E-08                          | 520000                                             | -1.85                  | -7.5751              | 5.7160                | 0.7                    | 71.4286              | 1.8539                   |
| compound_06 | -7.4               | -3.20                | -4.2             | 0.109                               | 0.000000547                       | 199000                                             | -0.96                  | -6.2620              | 5.2989                | 0.8                    | 9.1743               | 0.9626                   |
| compound_07 | -9.1               | -3.60                | -5.5             | 0.0634                              | 0.000000514                       | 123000                                             | -1.20                  | -6.2890              | 5.0899                | 0.8                    | 15.7729              | 1.1979                   |
| compound_08 | -9.0               | -2.80                | -6.2             | 0.21                                | 0.00000018                        | 1200000                                            | -0.68                  | -6.7447              | 6.0792                | 0.3                    | 4.7619               | 0.6778                   |
| compound_10 | -8.4               | -3.80                | -4.6             | 0.254                               | 0.0000009                         | 280000                                             | -0.60                  | -6.0458              | 5.4472                | 0.4                    | 3.9370               | 0.5952                   |
| compound_11 | -10.7              | -5.50                | -5.2             | 0.00033                             | 7.2E-10                           | 215000                                             | -3.48                  | -9.1427              | 5.3324                | 1.4                    | 3030.3030            | 3.4815                   |
| compound_12 | -9.5               | -3.80                | -5.7             | 0.00179                             | 3.81E-09                          | 472000                                             | -2.75                  | -8.4191              | 5.6739                | 3.0                    | 558.6592             | 2.7471                   |
| compound_13 | -9.8               | -4.10                | -5.7             | 0.0017                              | 0.000000023                       | 70000                                              | -2.77                  | -7.6383              | 4.8451                | 1.8                    | 588.2353             | 2.7696                   |
| compound_14 | -10.0              | -3.80                | -6.2             | 0.174                               | 0.000000236                       | 742000                                             | -0.76                  | -6.6271              | 5.8704                | 0.3                    | 5.7471               | 0.7595                   |
| compound_15 | -8.4               | -3.40                | -5.0             | 0.0064                              | 0.000000087                       | 77000                                              | -2.19                  | -7.0605              | 4.8865                | 3.3                    | 156.2500             | 2.1938                   |
| compound_17 | -12.3              | -4.20                | -8.1             | 0.000278                            | 0.000000172                       | 3060                                               | -3.56                  | -6.7645              | 3.4857                | 1.5                    | 3597.1223            | 3.5560                   |
| compound_18 | -11.2              | -4.30                | -6.9             | 0.000189                            | 4.66E-08                          | 4770                                               | -3.72                  | -7.3316              | 3.6785                | 4.6                    | 5291.0053            | 3.7235                   |
| compound_19 | -10.2              | -4.80                | -5.4             | 0.000285                            | 3.61E-08                          | 7770                                               | -3.55                  | -7.4425              | 3.8904                | 4.0                    | 3508.7719            | 3.5452                   |
| compound_20 | -14.1              | -4.00                | -10.1            | 0.000136                            | 8.48E-09                          | 16200                                              | -3.87                  | -8.0716              | 4.2095                | 4.8                    | 7352.9412            | 3.8665                   |
| compound_21 | -11.8              | -4.20                | -7.6             | 0.000485                            | 3.95E-09                          | 133000                                             | -3.31                  | -8.4034              | 5.1239                | 3.6                    | 2061.8557            | 3.3143                   |
| compound_22 | -11.7              | -3.00                | -8.7             | 0.000765                            | 2.4E-10                           | 3580000                                            | -3.12                  | -9.6198              | 6.5539                | 2.6                    | 1307.1895            | 3.1163                   |
| compound_35 | -11.3              | -4.30                | -7.0             | 0.0054                              | 0.000000033                       | 160000                                             | -2.27                  | -7.4815              | 5.2041                | 2.2                    | 185.1852             | 2.2676                   |
| compound_36 | -9.7               | -4.50                | -5.2             | 0.00139                             | 5.39E-08                          | 25300                                              | -2.86                  | -7.2684              | 4.4031                | 2.5                    | 719.4245             | 2.8570                   |
| compound_37 | -9.0               | -4.00                | -5.0             | 0.00201                             | 5.96E-09                          | 343000                                             | -2.70                  | -8.2248              | 5.5353                | 4.6                    | 497.5124             | 2.6968                   |
| compound_38 | -9.9               | -3.90                | -6.0             | 0.0288                              | 0.00000155                        | 18600                                              | -1.54                  | -5.8097              | 4.2695                | 1.0                    | 34.7222              | 1.5406                   |
| compound_40 | -10.0              | -4.00                | -6.0             | 0.0174                              | 0.00000124                        | 14200                                              | -1.76                  | -5.9066              | 4.1523                | 1.0                    | 57.4713              | 1.7595                   |
| compound_43 | -11.2              | -4.00                | -7.2             | 0.000679                            | 8.97E-09                          | 83800                                              | -3.17                  | -8.0472              | 4.9232                | 6.2                    | 1472.7541            | 3.1681                   |
| compound_50 | -10.3              | -4.70                | -5.6             | 0.000294                            | 0.000000195                       | 1650                                               | -3.53                  | -6.7100              | 3.2175                | 6.7                    | 3401.3605            | 3.5317                   |
| compound_51 | -10.3              | -4.60                | -5.7             | 0.00243                             | 1.87E-08                          | 130000                                             | -2.61                  | -7.7282              | 5.1139                | 3.6                    | 411.5226             | 2.6144                   |
| compound_60 | -12.7              | -6.00                | -6.7             | 0.000238                            | 3.68E-09                          | 64300                                              | -3.62                  | -8.4342              | 4.8082                | 0.4                    | 4201.6807            | 3.6234                   |
| compound_62 | -11.9              | -4.40                | -7.5             | 0.00453                             | 3.83E-08                          | 121000                                             | -2.34                  | -7.4168              | 5.0828                | 0.2                    | 220.7506             | 2.3439                   |
| compound_67 | -9.0               | -3.40                | -5.6             | 0.0256                              | 2.47E-08                          | 1260000                                            | -1.59                  | -7.6073              | 6.1004                | 0.1                    | 39.0625              | 1.5918                   |
| compound_68 | -8.6               | -3.40                | -5.2             | 0.0331                              | 0.000000133                       | 248000                                             | -1.48                  | -6.8761              | 5.3945                | 0.7                    | 30.2115              | 1.4802                   |
| compound_69 | -9.4               | -5.10                | -4.3             | 0.429                               | 0.00000134                        | 175000                                             | -0.37                  | -5.8729              | 5.2430                | 1.0                    | 2.3310               | 0.3675                   |
| compound_70 | -11.2              | -5.20                | -6.0             | 0.000989                            | 0.000000095                       | 10400                                              | -3.00                  | -7.0223              | 4.0170                | 0.5                    | 1011.1223            | 3.0048                   |

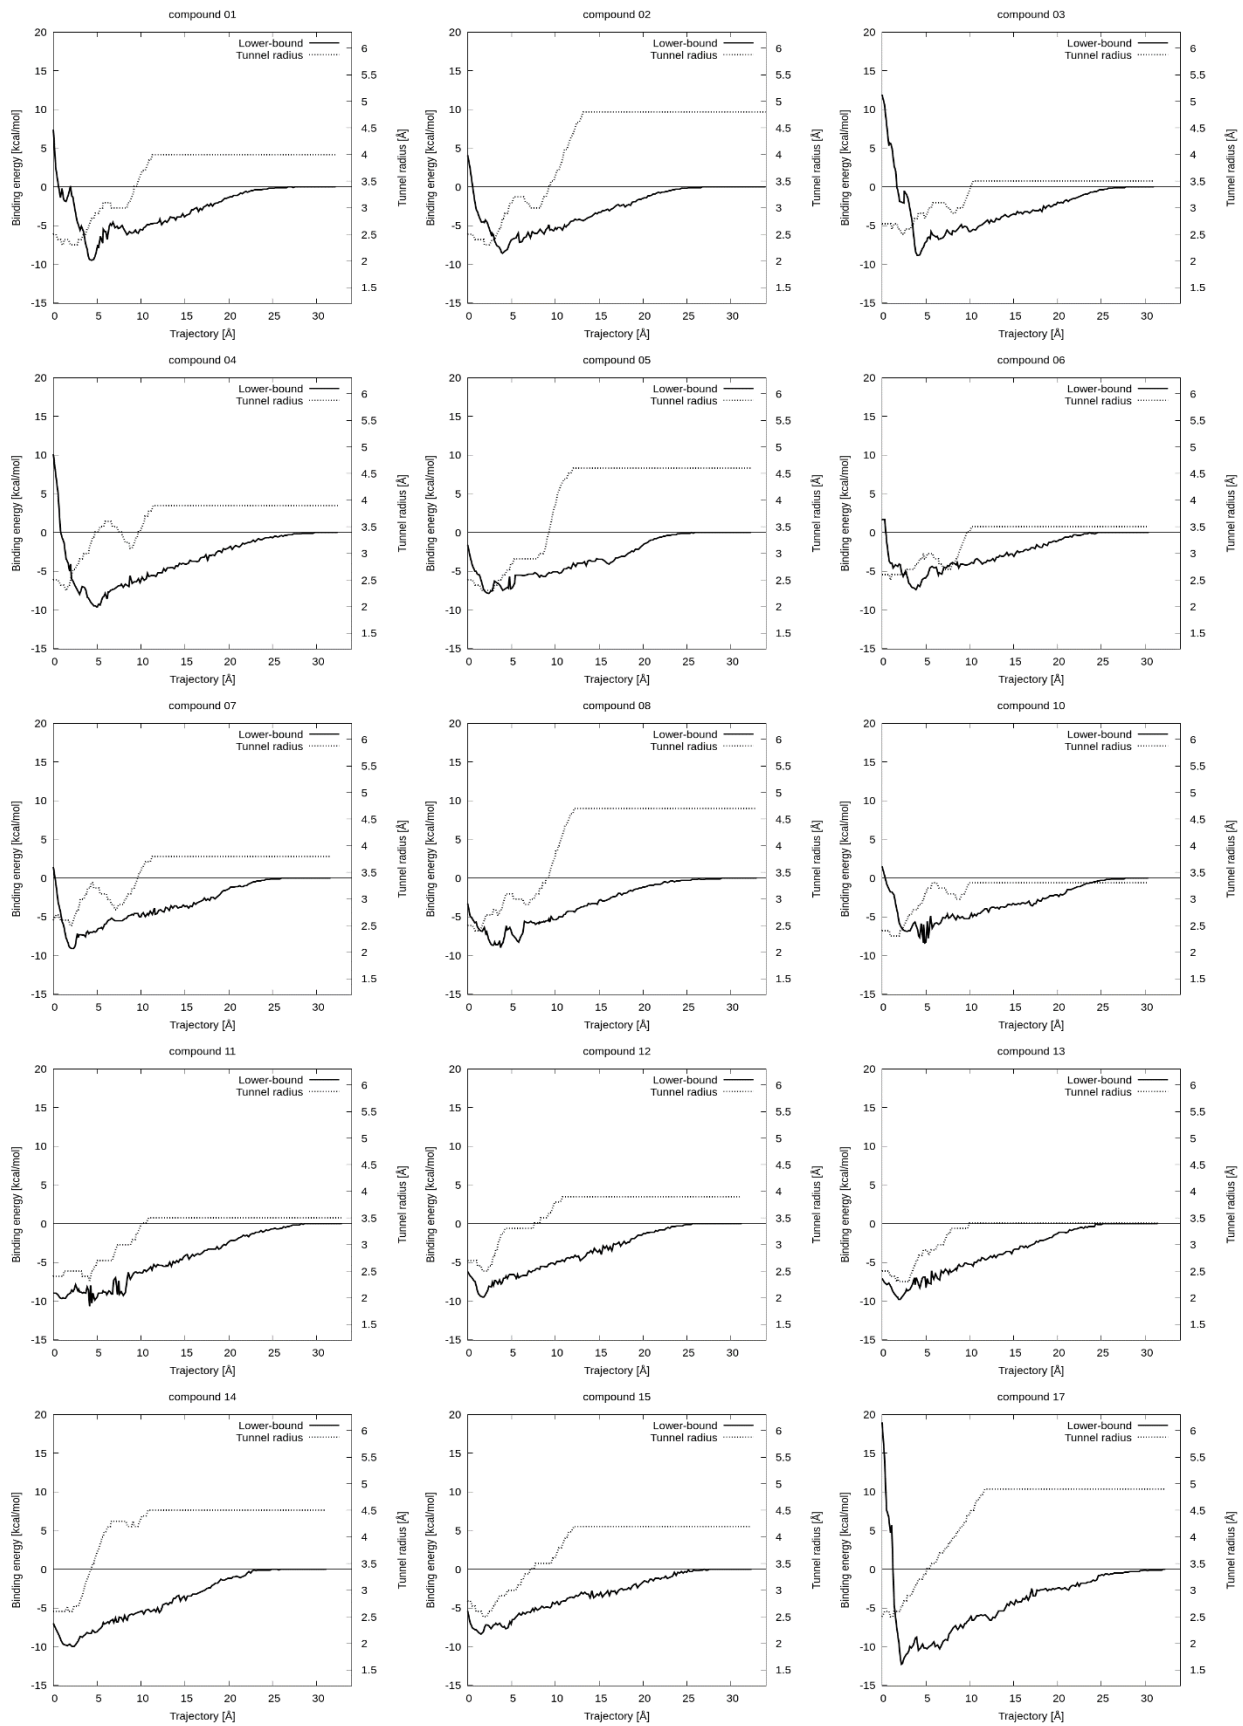

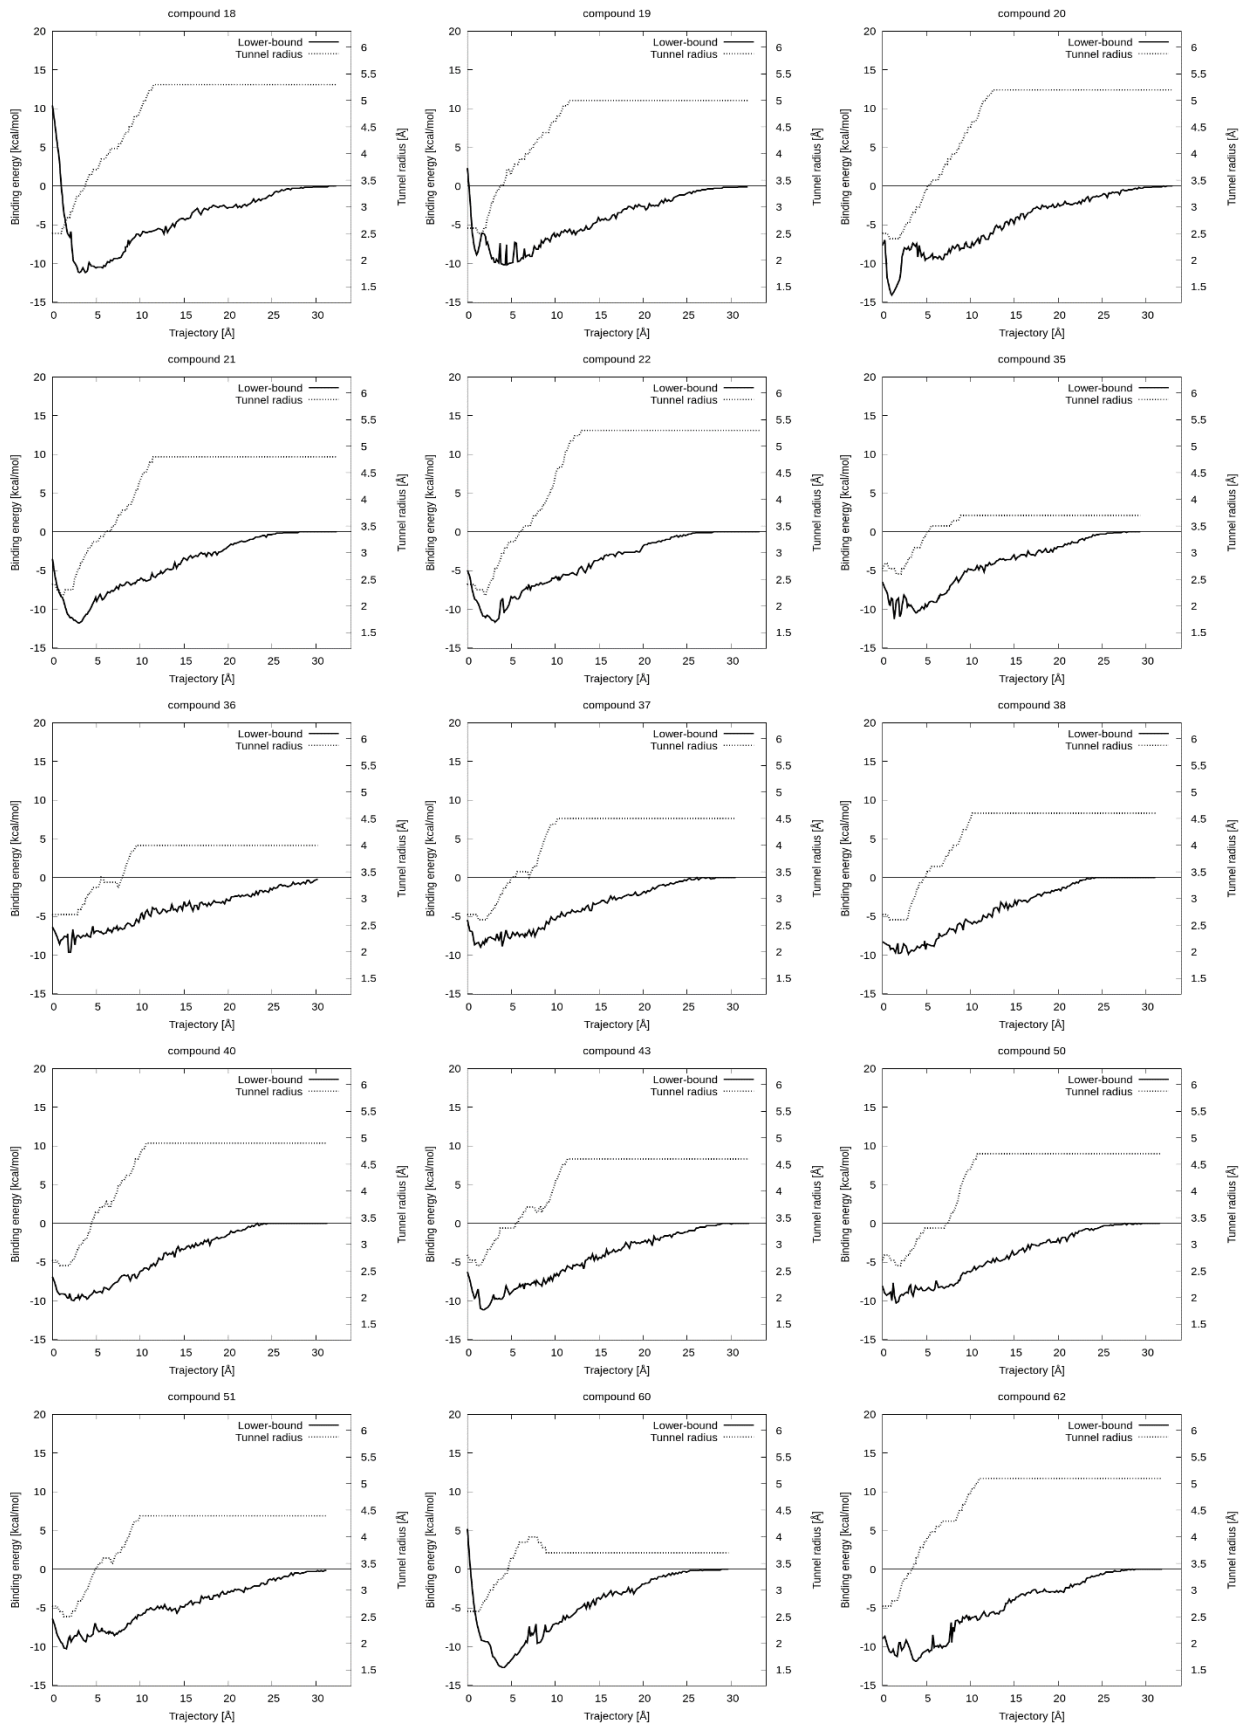

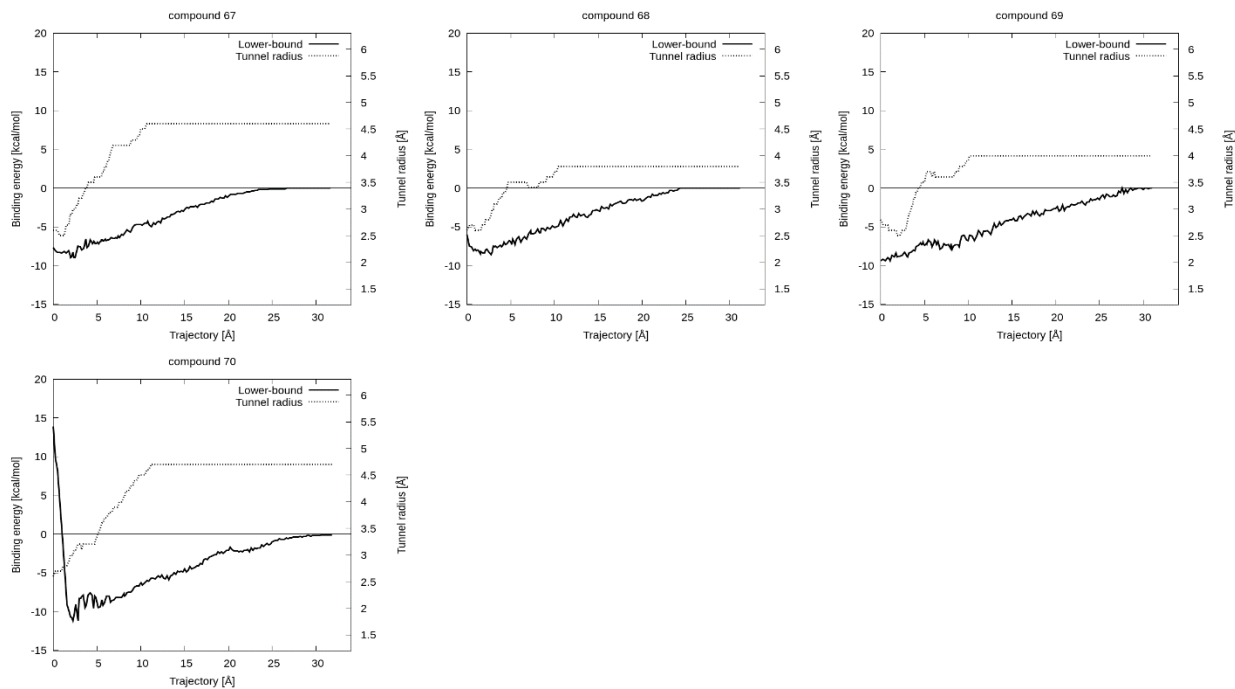

**Supplementary Figure S1.** Profile of potential energies of the dataset used to compare the results from CaverDock calculation and laboratory experiments.



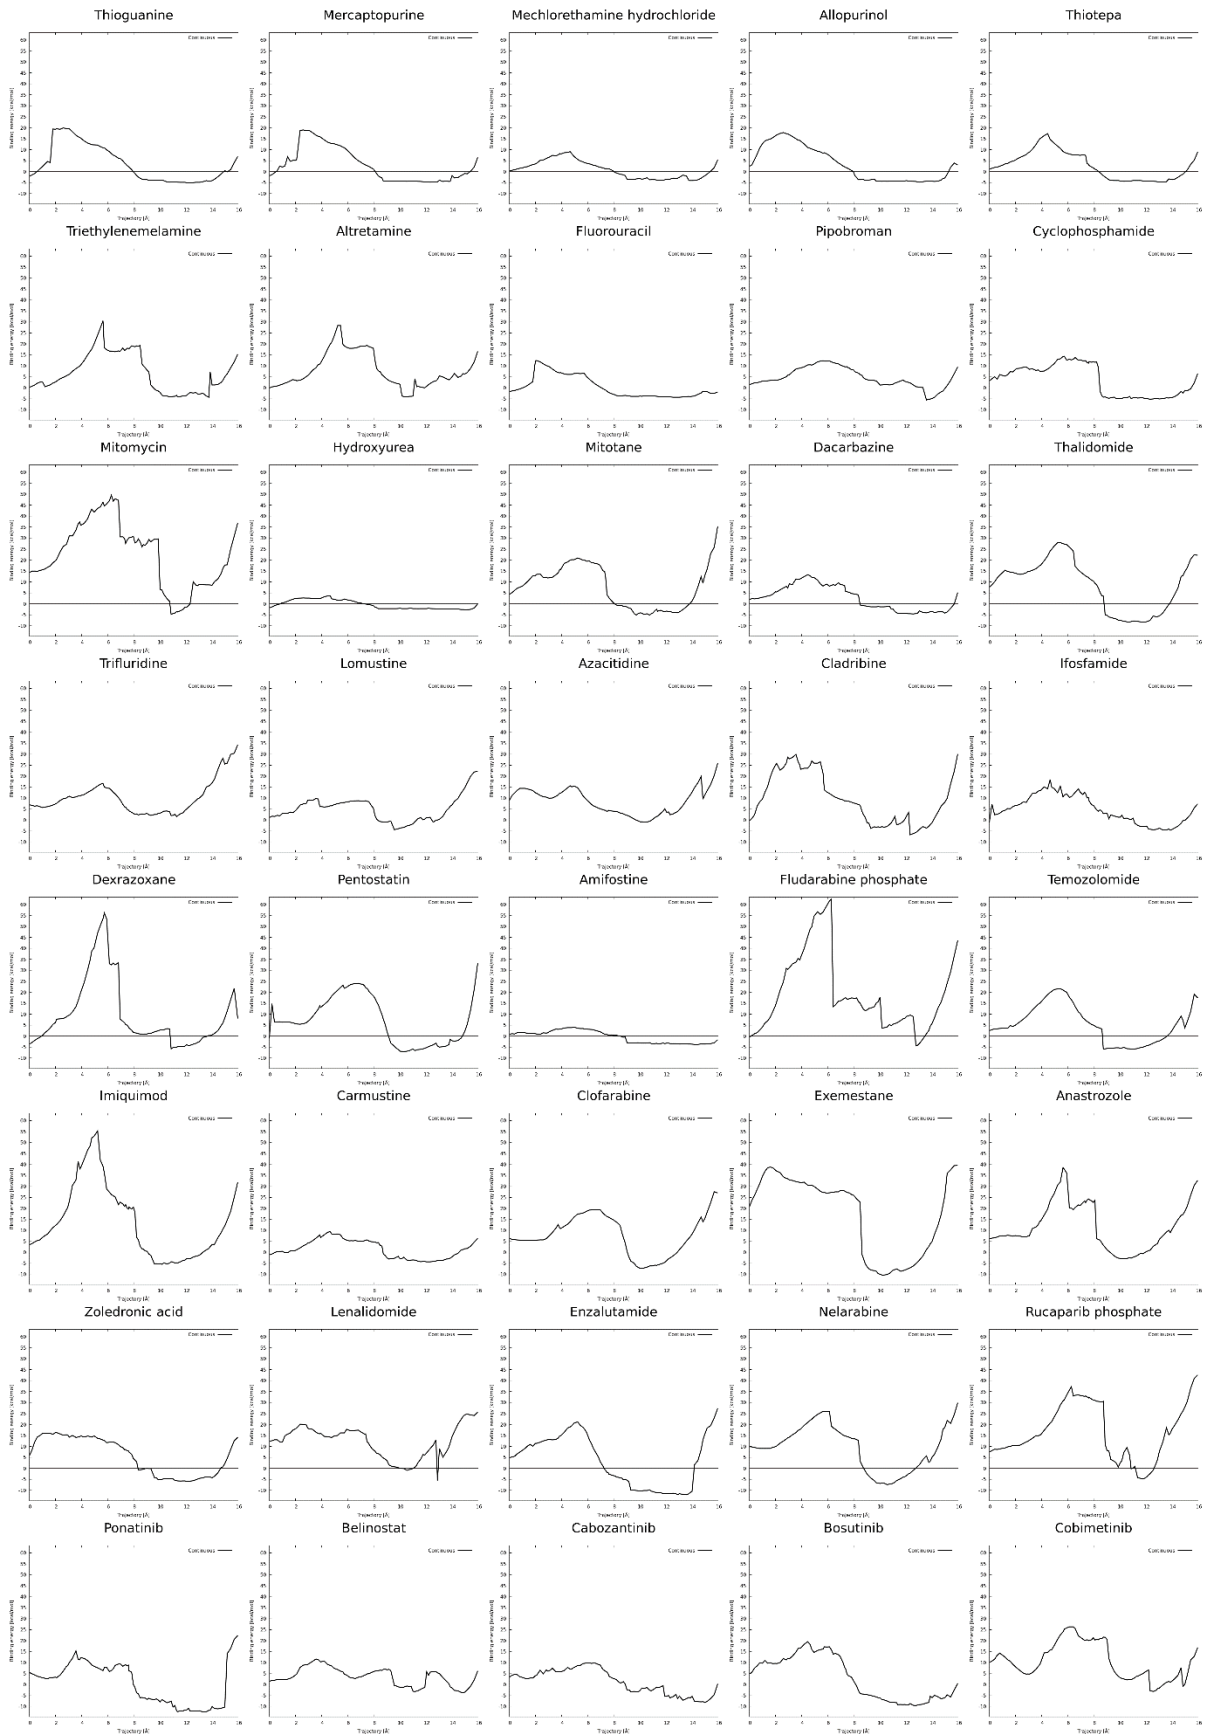

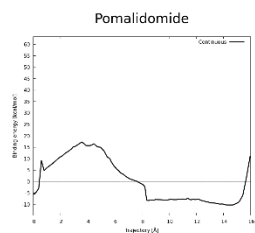

**Supplementary Figure S2.** Binding energy plots for all successfully finished jobs for the continuous trajectory calculation for the tunnel 1 of cytochrome P450 17A1. Binding energy (in kcal/mol) is plotted against the tunnel length (in Å).

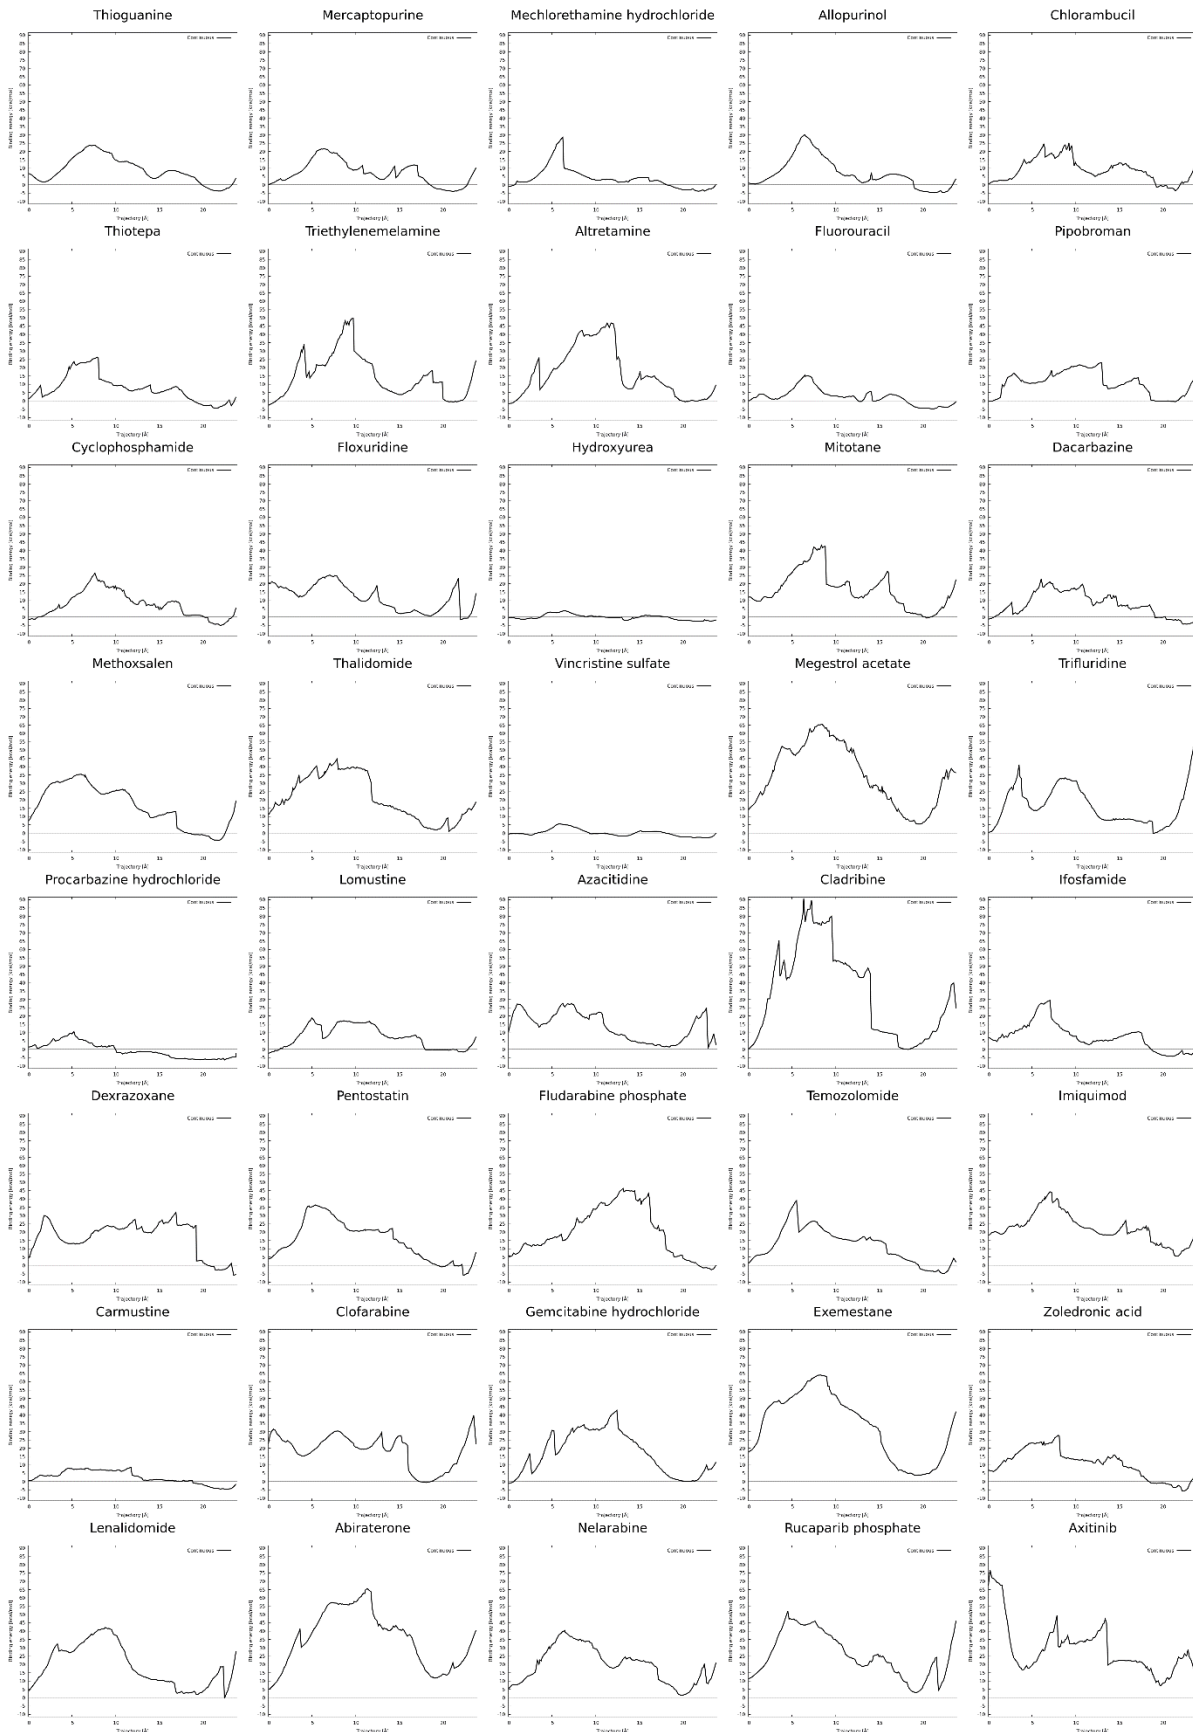

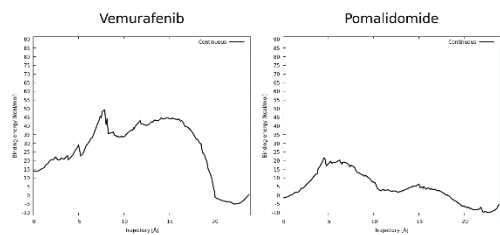

**Supplementary Figure S3.** Binding energy plots for all successfully finished jobs for the continuous trajectory calculation for the tunnel 2A of cytochrome P450 17A1. Binding energy (in kcal/mol) is plotted against the tunnel length (in Å).

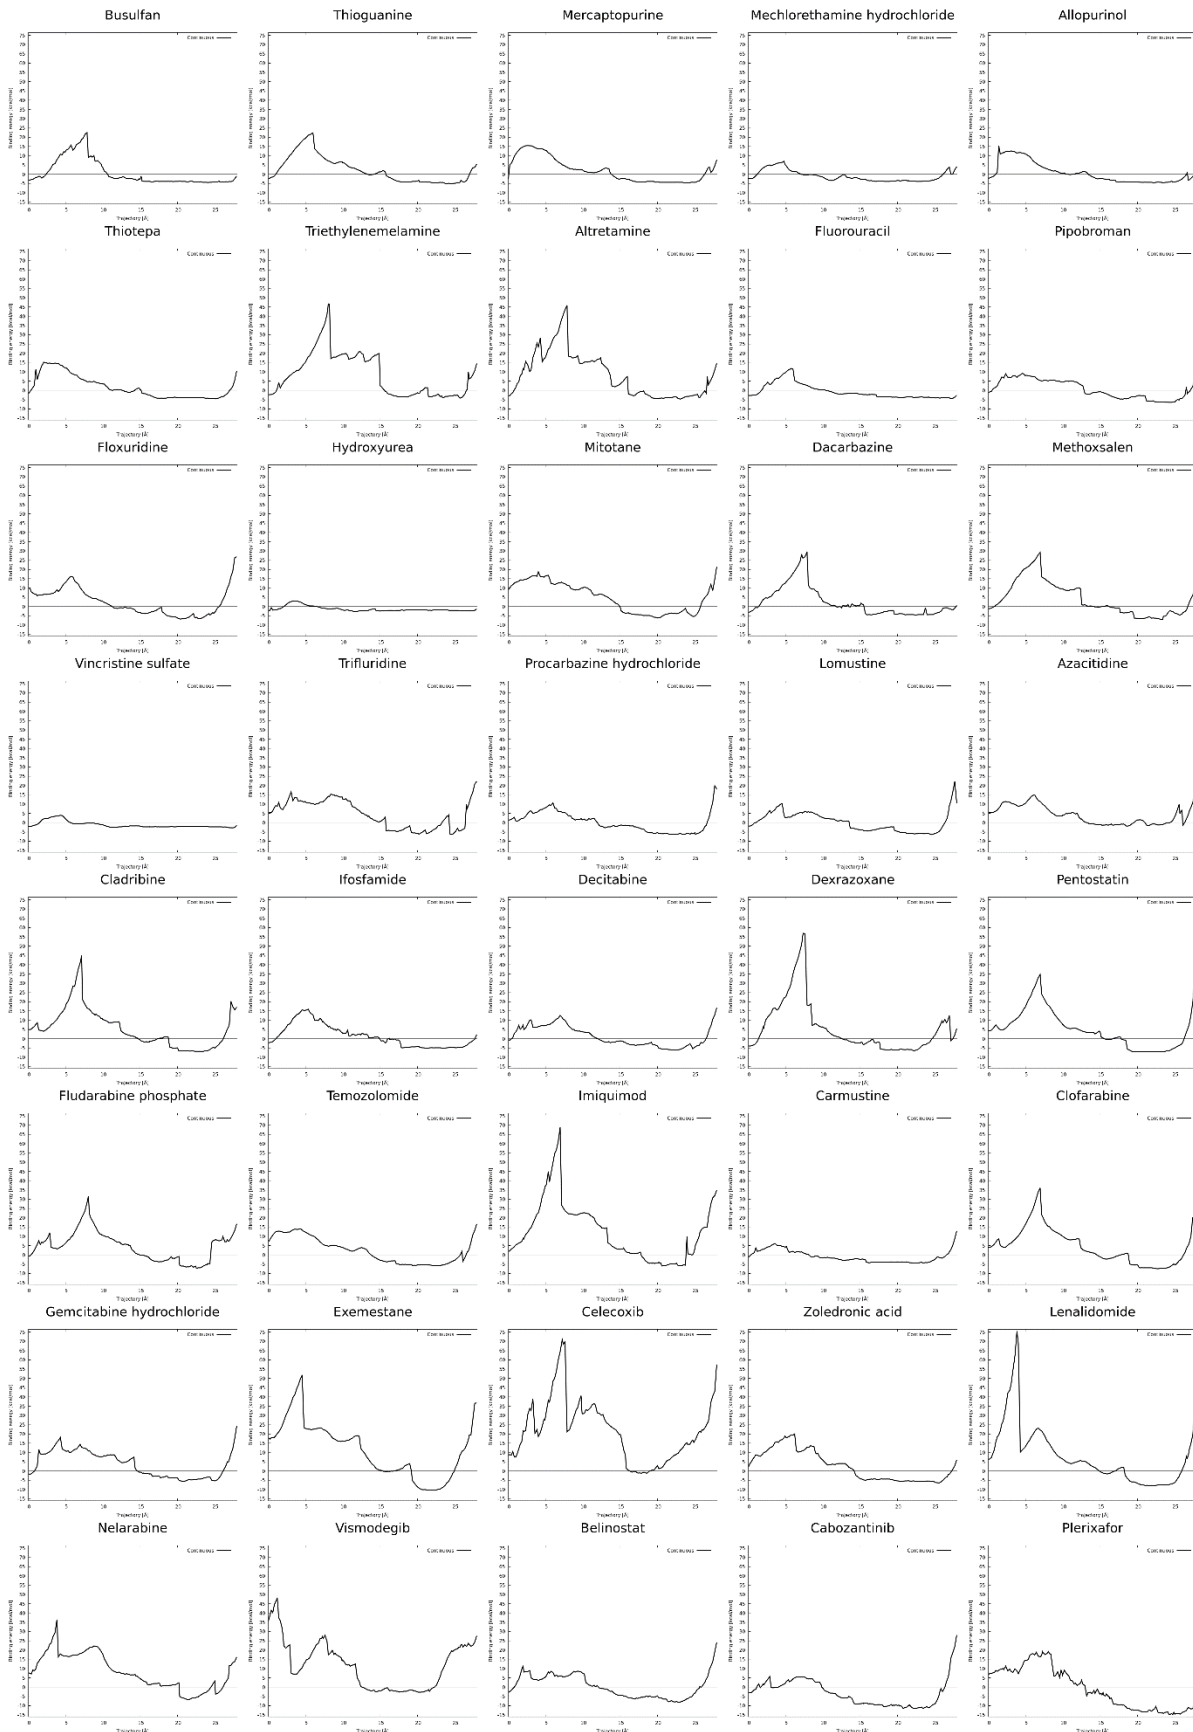

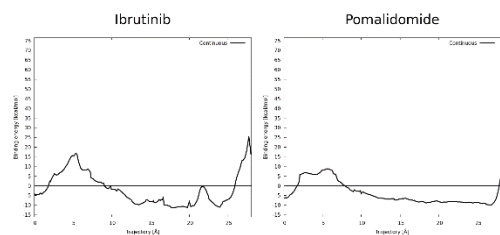

**Supplementary Figure S4.** Binding energy plots for all successfully finished jobs for the continuous trajectory calculation for the tunnel 3 of cytochrome P450 17A1. Binding energy (in kcal/mol) is plotted against the tunnel length (in Å).

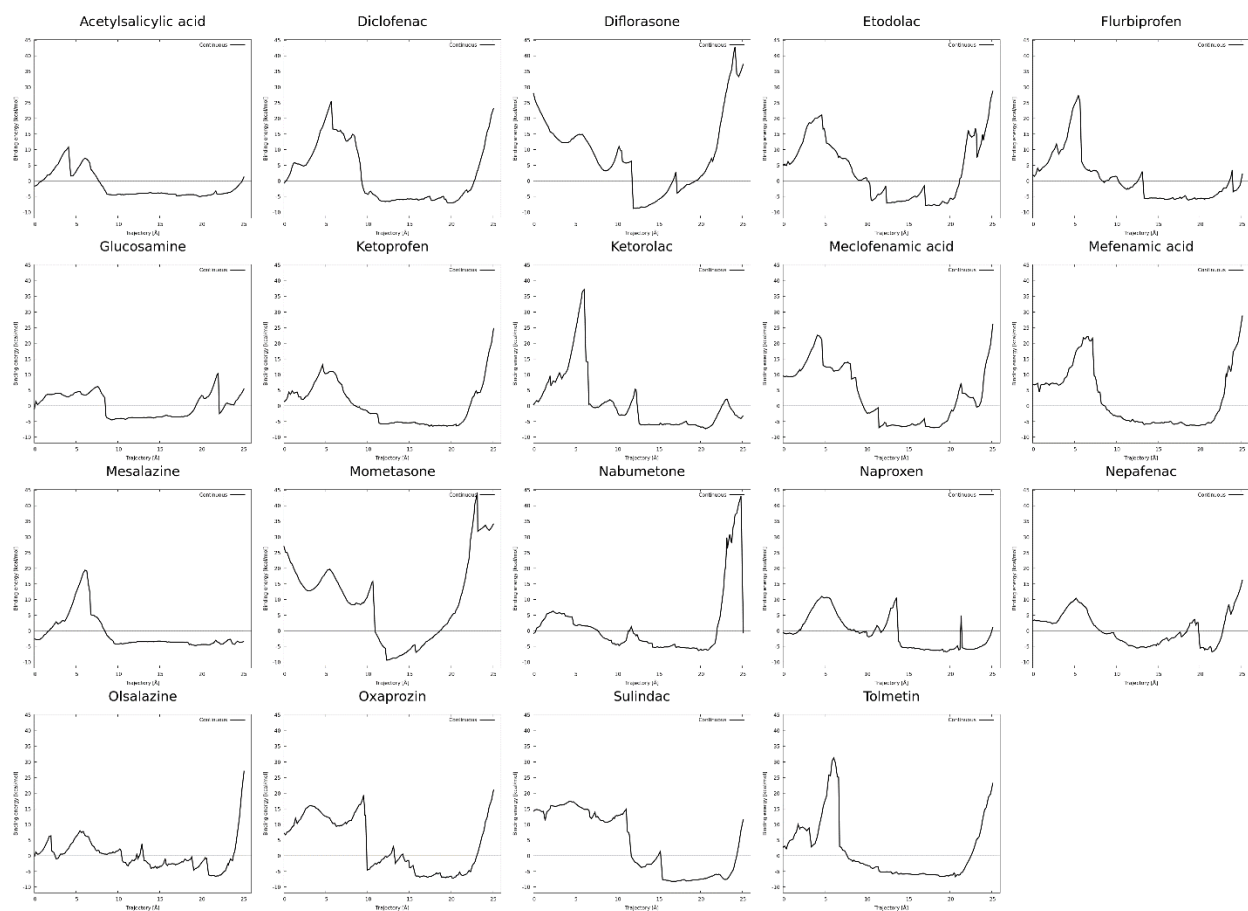

**Supplementary Figure S5.** Binding energy plots for all successfully finished jobs for the continuous trajectory calculation for the tunnel LTA4 of leukotriene A4 hydrolase/aminopeptidase. Binding energy (in kcal/mol) is plotted against the tunnel length (in Å).

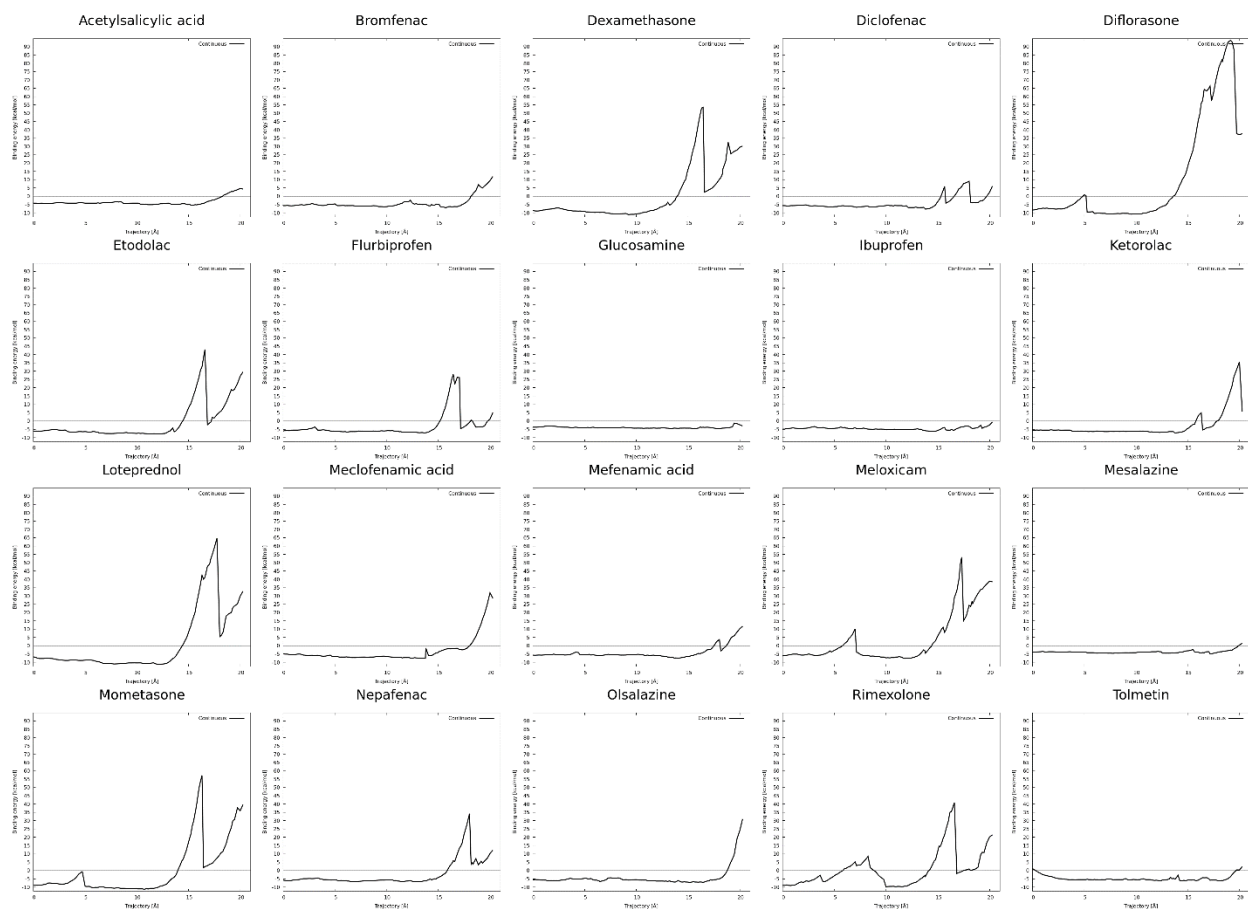

**Supplementary Figure S6.** Binding energy plots for all successfully finished jobs for the continuous trajectory calculation for the tunnel PGP of leukotriene A4 hydrolase/aminopeptidase. Binding energy (in kcal/mol) is plotted against the tunnel length (in Å).

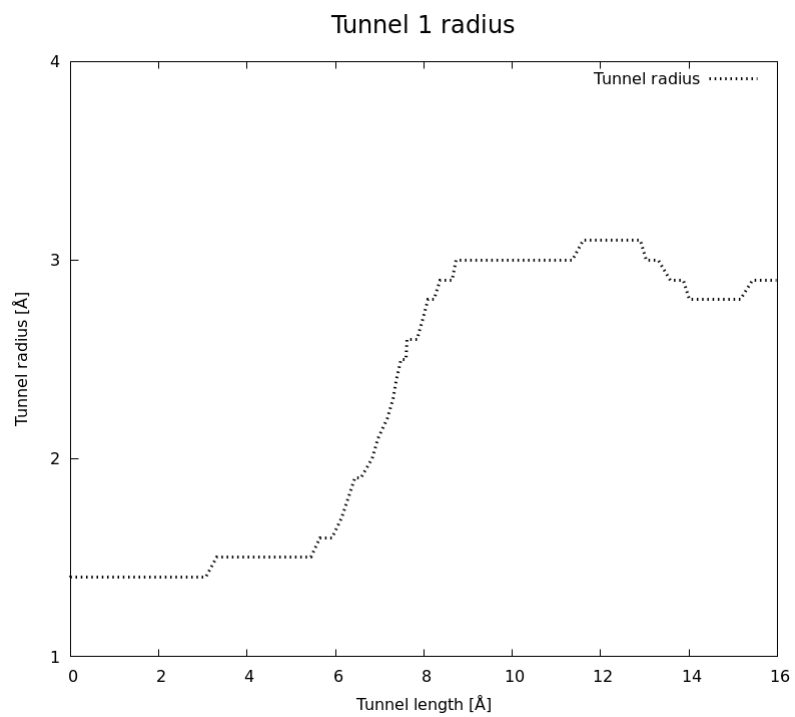

**Supplementary Figure S7.** Profile of the tunnel 1 of cytochrome P450 17A1.

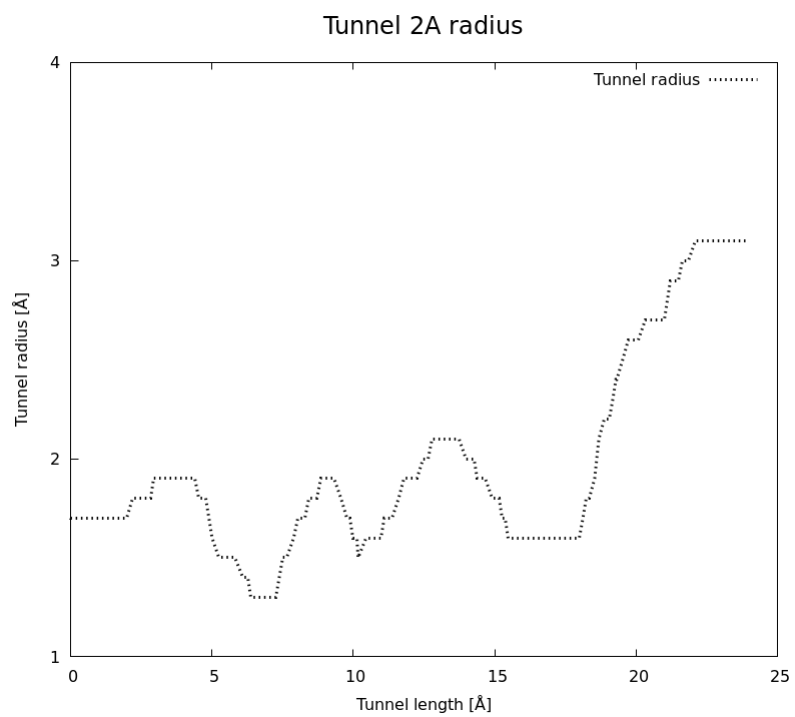

**Supplementary Figure S8.** Profile of the tunnel 2A of cytochrome P450 17A1.



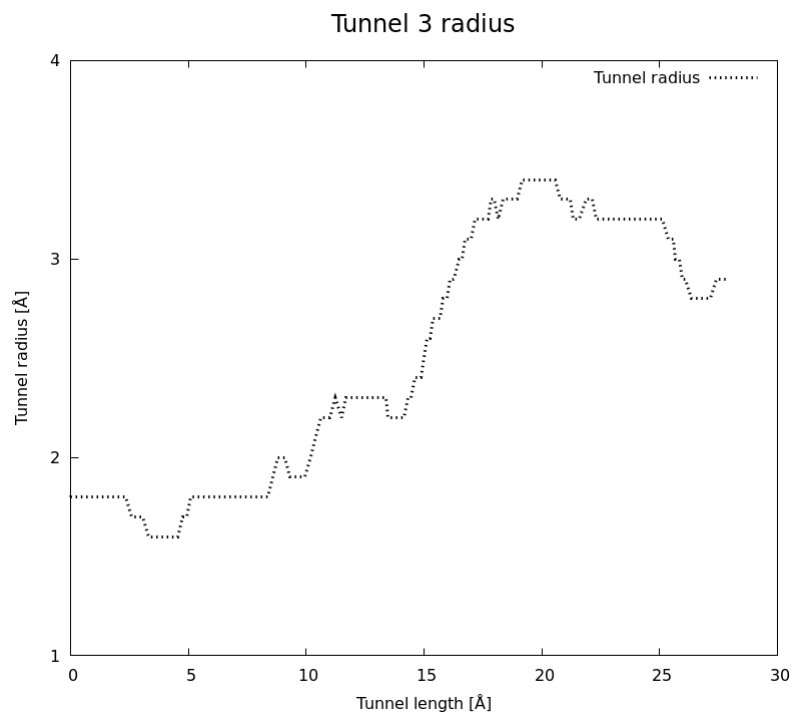

**Supplementary Figure S9.** Profile of the tunnel 3 of cytochrome P450 17A1.

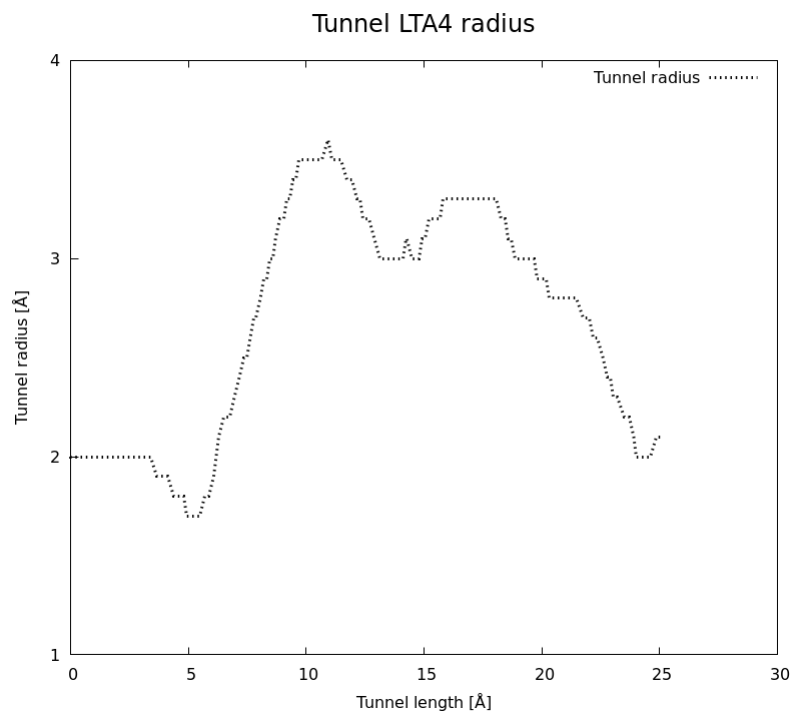

**Supplementary Figure S10.** Profile of the tunnel LTA4 of leukotriene A4 hydrolase/aminopeptidase.

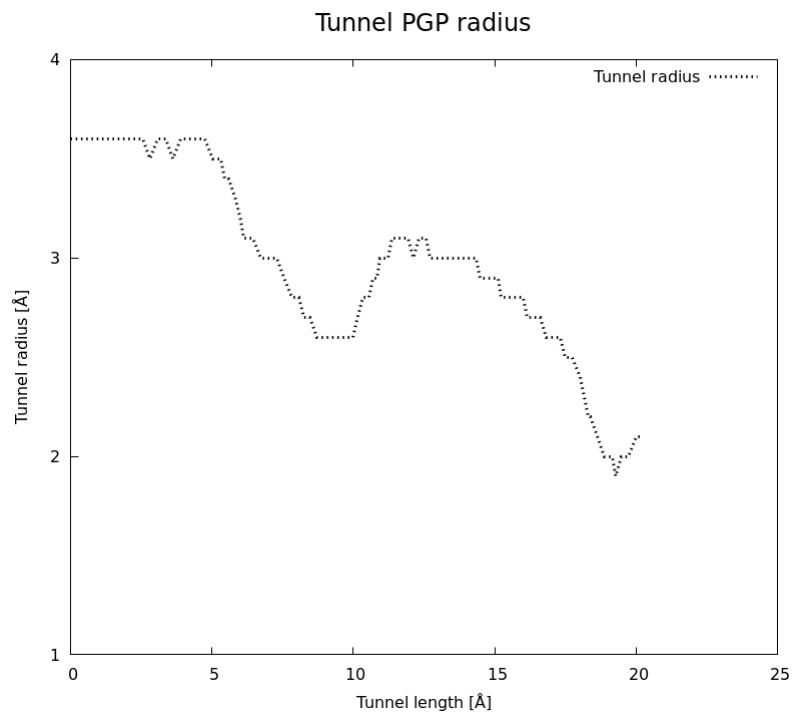

**Supplementary Figure S11.** Profile of the tunnel PGP of leukotriene A4 hydrolase/aminopeptidase.

**Supplementary Table S4.** Root mean square deviation (RMSD) of CaverDock *versus* AutoDock Vina minima for the target cytochrome P450 17A1. Lower bound calculations are presented for finished cases.

|                               | Tunnel 1 CaverDock Lower Bound vs AutoDock Vina - RMSD (Å) | Tunnel 2A CaverDock Lower Bound vs AutoDock Vina - RMSD (Å) | Tunnel 3 CaverDock Lower Bound vs AutoDock Vina - RMSD (Å) |
|-------------------------------|------------------------------------------------------------|-------------------------------------------------------------|------------------------------------------------------------|
| Methotrexate                  | 1.941                                                      | 7.666                                                       | 1.694                                                      |
| Busulfan                      | 1.704                                                      | 5.601                                                       | 1.326                                                      |
| Thioguanine                   | 0.128                                                      | 0.211                                                       | 0.21                                                       |
| Mercaptopurine                | 3.535                                                      | 0.35                                                        | 3.501                                                      |
| Mechlorethamine hydrochloride | 4.528                                                      | 0.358                                                       | 0.301                                                      |
| Allopurinol                   | 1.994                                                      | 1.89                                                        | 1.938                                                      |
| Chlorambucil                  | 1.307                                                      | 7.481                                                       | 7.644                                                      |
| Thiotepa                      | 0.657                                                      | 0.691                                                       | 0.127                                                      |
| Triethylenemelamine           | 4.543                                                      | 5.746                                                       | 0.554                                                      |
| Altretamine                   | 1.361                                                      | 0.957                                                       | 0.978                                                      |
| Fluorouracil                  | 0.309                                                      | 0.263                                                       | 0.345                                                      |
| Plicamycin                    | 14.788                                                     |                                                             |                                                            |
| Pipobroman                    | 0.318                                                      | 0.37                                                        | 0.197                                                      |
| Cyclophosphamide              | 3.245                                                      | 2.285                                                       | 3.237                                                      |
| Mitomycin                     | 6.618                                                      | 7.023                                                       | 6.619                                                      |
| Floxuridine                   | 4.61                                                       | 4.323                                                       | 2.936                                                      |
| Hydroxyurea                   | 0.293                                                      | 0.209                                                       | 0.363                                                      |
| Uracil mustard                | 5.155                                                      | 5.588                                                       | 1.337                                                      |
| Mitotane                      | 5.246                                                      | 5.247                                                       | 5.234                                                      |
| Dacarbazine                   | 4.811                                                      | 4.862                                                       | 1.265                                                      |
| Methoxsalen                   | 6.453                                                      | 0.475                                                       | 0.264                                                      |
| Thalidomide                   | 0.294                                                      | 3.995                                                       | 2.235                                                      |
| Megestrol acetate             | 0.707                                                      | 7.716                                                       | 3.134                                                      |
| Trifluridine                  | 0.988                                                      | 6.989                                                       | 0.259                                                      |
| Lomustine                     | 1.363                                                      | 5.868                                                       | 2.023                                                      |
| Streptozocin                  | 0.33                                                       | 0.461                                                       | 0.599                                                      |
| Azacididine                   | 6.403                                                      | 3.662                                                       | 6.367                                                      |
| Cladribine                    | 1.828                                                      | 4.02                                                        | 0.257                                                      |
| Ifosfamide                    | 0.874                                                      | 4.312                                                       | 4.386                                                      |
| Tretinoin                     | 1.137                                                      | 3.763                                                       | 1.159                                                      |
| Teniposide                    | 2.033                                                      |                                                             |                                                            |
| Decitabine                    | 2.885                                                      | 2.659                                                       | 2.461                                                      |
| Bendamustine hydrochloride    | 0.371                                                      | 8.89                                                        | 0.764                                                      |
| Etoposide                     | 0.147                                                      |                                                             | 0.261                                                      |
| Dexrazoxane                   | 2.928                                                      | 6.861                                                       | 2.071                                                      |
| Pentostatin                   | 0.172                                                      | 3.911                                                       | 1.569                                                      |
| Sirolimus                     | 9.125                                                      |                                                             |                                                            |
| Valrubicin                    | 0.988                                                      |                                                             |                                                            |
| Idarubicin hydrochloride      | 1.039                                                      |                                                             | 0.652                                                      |
| Mitoxantrone                  | 7.269                                                      | 9.219                                                       | 7.511                                                      |
| Amifostine                    | 5.497                                                      | 5.656                                                       | 2.855                                                      |
| Fludarabine phosphate         | 0.299                                                      | 0.745                                                       | 0.395                                                      |
| Temozolomide                  | 0.135                                                      | 0.17                                                        | 0.12                                                       |
| Imiquimod                     | 0.883                                                      | 4.8                                                         | 0.869                                                      |
| Carmustine                    | 0.373                                                      | 4.555                                                       | 1.082                                                      |
| Clofarabine                   | 1.714                                                      | 4.3                                                         | 0.147                                                      |
| Vorinostat                    | 1.859                                                      | 7.581                                                       | 2.696                                                      |
| Capecitabine                  | 3.604                                                      | 7.388                                                       | 0.359                                                      |
| Exemestane                    | 0.119                                                      | 4.075                                                       | 0.228                                                      |
| Gefitinib                     | 2.813                                                      | 8.187                                                       | 1.052                                                      |
| Fulvestrant                   | 2.78                                                       | 1.315                                                       | 0.733                                                      |
| Anastrozole                   | 0.897                                                      | 4.319                                                       | 0.126                                                      |
| Letrozole                     | 6.482                                                      | 6.018                                                       | 6.551                                                      |
| Celecoxib                     | 5.773                                                      | 6.994                                                       | 1.326                                                      |

|                           |        |        |       |
|---------------------------|--------|--------|-------|
| Zoledronic acid           | 1.292  | 1.555  | 1.654 |
| Dasatinib                 | 2.695  | 12.302 | 0.109 |
| Everolimus                | 8.859  |        |       |
| Imatinib                  | 11.942 | 7.076  | 0.061 |
| Lapatinib                 | 1.995  | 1.989  | 1.354 |
| Nilotinib                 | 5.858  | 13.392 | 0.694 |
| Sorafenib                 | 2.161  | 12.781 | 2.793 |
| Lenalidomide              | 0.166  | 7.045  | 0.164 |
| Ixabepilone               | 1.332  |        |       |
| Raloxifene                | 1.151  | 10.282 | 3.274 |
| Abiraterone               | 0.11   | 8.023  | 0.156 |
| Sunitinib                 | 1.997  | 11.148 | 0.225 |
| Afatinib                  | 1.214  | 6.169  | 0.21  |
| Olaparib                  | 0.196  | 10.487 | 0.383 |
| Pralatrexate              | 2.496  | 6.568  | 2.625 |
| Enzalutamide              | 1.015  | 0.951  |       |
| Lenvatinib                | 1.453  | 4.405  | 0.267 |
| Nelarabine                | 0.221  | 7.178  | 0.219 |
| Vismodegib                | 2.325  | 10.628 | 2.548 |
| Rucaparib phosphate       | 0.365  | 8.854  | 0.233 |
| Crizotinib                | 8.337  | 5.532  | 0.955 |
| Axitinib                  | 1.778  | 8.901  | 9.631 |
| Trametinib                |        | 0.196  | 0.163 |
| Palbociclib               | 4.22   | 3.897  | 0.775 |
| Carfilzomib               | 2.827  |        |       |
| Omacetaxine mepesuccinate | 0.354  | 4.996  | 2.739 |
| Ponatinib                 | 7.068  | 7.157  | 7.108 |
| Belinostat                | 2.164  | 7.887  | 7.961 |
| Idelalisib                | 1.036  |        | 3.627 |
| Vandetanib                | 3.918  | 4.802  | 0.161 |
| Cabozantinib              | 6.684  | 6.746  | 6.699 |
| Panobinostat              | 7.015  | 6.481  | 7.677 |
| Erismodegib               | 14.23  | 14.203 | 0.122 |
| Plerixafor                | 1.343  | 1.455  | 5.273 |
| Vemurafenib               | 2.661  | 11.358 | 1.176 |
| Ibrutinib                 | 1.196  | 1.896  | 0.122 |
| Regorafenib               | 2.29   | 2.144  | 2.266 |
| Alectinib                 | 12.465 |        |       |
| Bosutinib                 | 0.524  | 0.558  | 0.362 |
| Venetoclax                | 3.143  |        |       |
| Cobimetinib               | 4.448  | 7.203  | 1.69  |
| Pomalidomide              | 0.296  | 0.307  | 0.175 |
| Ceritinib                 | 9.207  | 11.022 | 2.979 |
| Ribociclib                | 1.23   | 10.922 | 0.177 |
| Osimertinib               | 0.733  | 9.723  | 0.2   |
| Uridine triacetate        | 1.059  | 1.984  | 0.263 |

**Supplementary Table S5.** Root mean square deviation (RMSD) of CaverDock *versus* AutoDock Vina minima for the target cytochrome P450 17A1. Upper bound calculations are presented for finished cases.

|                               | Tunnel 1 CaverDock<br>Continuous vs AutoDock Vina -<br>RMSD (Å) | Tunnel 2A CaverDock<br>Continuous vs AutoDock Vina -<br>RMSD (Å) | Tunnel 3 CaverDock<br>Continuous vs AutoDock Vina -<br>RMSD (Å) |
|-------------------------------|-----------------------------------------------------------------|------------------------------------------------------------------|-----------------------------------------------------------------|
| Busulfan                      |                                                                 |                                                                  | 15.966                                                          |
| Thioguanine                   | 7.436                                                           | 8.27                                                             | 7.85                                                            |
| Mercaptopurine                | 10.407                                                          | 10.824                                                           | 9.379                                                           |
| Mechlorethamine hydrochloride | 5.625                                                           | 10.149                                                           | 10.394                                                          |
| Allopurinol                   | 8.06                                                            | 8.608                                                            | 10.935                                                          |
| Chlorambucil                  |                                                                 | 14.009                                                           |                                                                 |
| Thiotepa                      | 5.764                                                           | 10.933                                                           | 11.377                                                          |
| Triethylenemelamine           | 7.678                                                           | 13.884                                                           | 11.148                                                          |
| Altretamine                   | 7.35                                                            | 13.669                                                           | 15.934                                                          |
| Fluorouracil                  | 6.047                                                           | 7.967                                                            | 8.694                                                           |
| Pipobroman                    | 6.274                                                           | 11.625                                                           | 10.278                                                          |
| Cyclophosphamide              | 5.105                                                           | 9.57                                                             |                                                                 |
| Mitomycin                     | 6.79                                                            |                                                                  |                                                                 |
| Floxuridine                   |                                                                 | 10.271                                                           | 7.123                                                           |
| Hydroxyurea                   | 7.456                                                           | 7.456                                                            | 20.023                                                          |
| Mitotane                      | 6.234                                                           | 10.377                                                           | 9.606                                                           |
| Dacarbazine                   | 6.012                                                           | 12.422                                                           | 11.696                                                          |
| Methoxsalen                   |                                                                 | 7.913                                                            | 7.43                                                            |
| Thalidomide                   | 4.996                                                           | 11.667                                                           |                                                                 |
| Megestrol acetate             |                                                                 | 10.012                                                           |                                                                 |
| Trifluridine                  | 5.983                                                           | 13.858                                                           | 10.785                                                          |
| Lomustine                     | 8.986                                                           | 10.916                                                           | 11.011                                                          |
| Azacitidine                   | 5.724                                                           | 8.549                                                            | 9.221                                                           |
| Cladribine                    | 7.052                                                           | 15.263                                                           | 8.879                                                           |
| Ifosfamide                    | 8.888                                                           | 9.482                                                            | 9.506                                                           |
| Decitabine                    |                                                                 |                                                                  | 10.139                                                          |
| Dexrazoxane                   | 8.767                                                           | 12.094                                                           | 10.991                                                          |
| Pentostatin                   | 7.848                                                           | 9.8                                                              | 7.984                                                           |
| Amifostine                    | 5.633                                                           |                                                                  |                                                                 |
| Fludarabine phosphate         | 6.726                                                           | 11.269                                                           | 9.117                                                           |
| Temozolomide                  | 5.797                                                           | 10.645                                                           | 7.704                                                           |
| Imiquimod                     | 6.977                                                           | 9.389                                                            | 11.414                                                          |
| Carmustine                    | 6.717                                                           | 8.584                                                            | 10.643                                                          |
| Clofarabine                   | 7.258                                                           | 12.582                                                           | 7.335                                                           |
| Exemestane                    | 6.232                                                           | 10.622                                                           | 8.000                                                           |
| Anastrozole                   | 8.115                                                           |                                                                  |                                                                 |
| Celecoxib                     |                                                                 |                                                                  | 13.645                                                          |
| Zoledronic acid               | 6.488                                                           | 8.133                                                            | 7.748                                                           |
| Lenalidomide                  | 4.943                                                           | 11.07                                                            | 8.968                                                           |
| Abiraterone                   |                                                                 | 11.691                                                           |                                                                 |
| Enzalutamide                  | 5.478                                                           |                                                                  |                                                                 |
| Nelarabine                    | 8.067                                                           | 13.751                                                           | 12.702                                                          |
| Vismodegib                    |                                                                 |                                                                  | 13.5                                                            |
| Rucaparib phosphate           | 7.025                                                           | 10.95                                                            |                                                                 |
| Axitinib                      |                                                                 | 13.122                                                           |                                                                 |
| Ponatinib                     | 6.181                                                           |                                                                  |                                                                 |
| Belinostat                    | 6.605                                                           |                                                                  | 12.436                                                          |
| Cabozantinib                  | 7.616                                                           |                                                                  | 13.034                                                          |
| Plerixafor                    |                                                                 |                                                                  | 7.394                                                           |
| Vemurafenib                   |                                                                 | 15.39                                                            |                                                                 |
| Ibrutinib                     |                                                                 |                                                                  | 10.689                                                          |
| Bosutinib                     | 5.041                                                           |                                                                  |                                                                 |
| Cobimetinib                   | 8.923                                                           |                                                                  |                                                                 |
| Pomalidomide                  | 6.132                                                           | 7.166                                                            | 9.037                                                           |

**Supplementary Table S6.** Root mean square deviation (RMSD) of CaverDock *versus* AutoDock Vina minima for the target leukotriene A4 hydrolase/aminopeptidase. Lower bound calculations are presented for finished cases.

|                             | Tunnel LTA4 CaverDock Lower Bound vs AutoDock Vina - RMSD (Å) | Tunnel PGP CaverDock Lower Bound vs AutoDock Vina - RMSD (Å) |
|-----------------------------|---------------------------------------------------------------|--------------------------------------------------------------|
| Acetylsalicylic_acid        | 3.815                                                         | 0.514                                                        |
| Balsalazide                 | 7.686                                                         | 1.656                                                        |
| Beclomethasone_dipropionate |                                                               | 3.242                                                        |
| Betamethasone               | 8.434                                                         | 0.064                                                        |
| Bromfenac                   | 5.276                                                         | 5.322                                                        |
| Clobetasol_propionate       | 2.072                                                         | 1.706                                                        |
| Clocortolone                | 7.11                                                          | 3.641                                                        |
| Cromoglicic_acid            |                                                               | 10.255                                                       |
| Desoximetasone              | 7.576                                                         | 0.187                                                        |
| Dexamethasone               | 8.426                                                         | 0.121                                                        |
| Diclofenac                  | 0.131                                                         | 0.862                                                        |
| Difenoxin                   | 9.517                                                         | 0.366                                                        |
| Diflorasone                 | 7.398                                                         | 0.341                                                        |
| Diphenoxylate               | 9.654                                                         | 1.743                                                        |
| Etodolac                    | 0.274                                                         | 6.545                                                        |
| Fenoprofen                  | 1.97                                                          | 1.548                                                        |
| Flunisolide                 | 0.431                                                         | 0.08                                                         |
| Flurbiprofen                | 1.311                                                         | 1.287                                                        |
| Fluticasone_propionate      | 10.36                                                         | 0.176                                                        |
| Glucosamine                 | 12.324                                                        | 12.313                                                       |
| Hydrocortisone              | 3.951                                                         | 0.144                                                        |
| Ibuprofen                   | 5.124                                                         | 4.602                                                        |
| Indomethacin                | 10.685                                                        | 7.577                                                        |
| Ketoprofen                  | 7.059                                                         | 6.906                                                        |
| Ketorolac                   | 3.378                                                         | 1.524                                                        |
| Loperamide                  | 7.482                                                         | 0.102                                                        |
| Loteprednol                 | 6.899                                                         | 0.123                                                        |
| Meclofenamic_acid           | 0.329                                                         | 0.385                                                        |
| Mefenamic_acid              | 2.567                                                         | 0.899                                                        |
| Meloxicam                   | 10.962                                                        | 0.275                                                        |
| Mesalazine                  | 12.518                                                        | 12.686                                                       |
| Methylprednisolone          | 7.89                                                          | 0.287                                                        |
| Mometasone                  | 7.829                                                         | 0.366                                                        |
| Nabumetone                  | 2.442                                                         | 0.795                                                        |
| Naproxen                    | 2.051                                                         | 0.341                                                        |
| Nepafenac                   | 0.97                                                          | 4.387                                                        |
| Olsalazine                  | 1.197                                                         | 0.402                                                        |
| Oxaprozin                   | 4.098                                                         | 1.447                                                        |
| Paromomycin                 | 0.842                                                         | 7.014                                                        |
| Piroxicam                   | 9.998                                                         | 7.791                                                        |
| Prednisolone                | 4.25                                                          | 0.285                                                        |
| Prednisone                  | 2.816                                                         | 8.524                                                        |
| Rabeprazole                 | 5.038                                                         | 8.407                                                        |
| Rimexolone                  | 8.275                                                         | 0.195                                                        |
| Roflumilast                 | 6.908                                                         | 9.000                                                        |
| Streptomycin                | 8.427                                                         | 4.286                                                        |
| Sulindac                    | 1.067                                                         | 0.222                                                        |
| Tolmetin                    | 1.853                                                         | 0.236                                                        |
| Triamcinolone               | 8.362                                                         | 0.171                                                        |

**Supplementary Table S7.** Root mean square deviation (RMSD) of CaverDock minima *versus* AutoDock Vina minima for the target leukotriene A4 hydrolase/aminopeptidase. Continuous trajectory calculations are presented for finished cases.

|                      | Tunnel LTA4 CaverDock Continuous vs AutoDock Vina - RMSD (Å) | Tunnel PGP CaverDock Continuous vs AutoDock Vina - RMSD (Å) |
|----------------------|--------------------------------------------------------------|-------------------------------------------------------------|
| Acetylsalicylic_acid | 9.965                                                        | 6.865                                                       |
| Bromfenac            |                                                              | 7.139                                                       |
| Dexamethasone        |                                                              | 3.597                                                       |
| Diclofenac           | 11.544                                                       | 8.428                                                       |
| Diflorasone          | 10.204                                                       | 5.936                                                       |
| Etodolac             | 11.907                                                       | 8.783                                                       |
| Flurbiprofen         | 11.544                                                       | 9.081                                                       |
| Glucosamine          | 8.186                                                        | 12.961                                                      |
| Ibuprofen            |                                                              | 9.268                                                       |
| Ketoprofen           | 11.589                                                       |                                                             |
| Ketorolac            | 13.555                                                       | 5.567                                                       |
| Loteprednol          |                                                              | 2.511                                                       |
| Meclofenamic acid    | 10.942                                                       | 6.428                                                       |
| Mefenamic acid       | 12.138                                                       | 7.500                                                       |
| Meloxicam            |                                                              | 6.895                                                       |
| Mesalazine           | 21.069                                                       | 12.563                                                      |
| Mometasone           | 9.763                                                        | 5.146                                                       |
| Nabumetone           | 11.041                                                       |                                                             |
| Naproxen             | 12.523                                                       |                                                             |
| Nepafenac            | 10.94                                                        | 10.483                                                      |
| Olsalazine           | 11.183                                                       | 3.966                                                       |
| Oxaprozin            | 10.93                                                        |                                                             |
| Rimexolone           |                                                              | 6.266                                                       |

## References

- Arolas, J. L., Botelho, T. O., Vilcinskas, A., and Gomis-Rüth, F. X. (2011). Structural evidence for standard-mechanism inhibition in metallopeptidases from a complex poised to resynthesize a peptide bond. *Angew. Chem. Int. Ed.* 50, 10357–10360. doi:10.1002/anie.201103262.
- Čolović, M. B., Krstić, D. Z., Lazarević-Pašti, T. D., Bondžić, A. M., and Vasić, V. M. (2013). Acetylcholinesterase inhibitors: pharmacology and toxicology. *Curr. Neuropharmacol.* 11, 315–335. doi:10.2174/1570159X11311030006.
- Silman, I., and Sussman, J. L. (2005). Acetylcholinesterase: “classical” and “non-classical” functions and pharmacology. *Curr. Opin. Pharmacol.* 5, 293–302. doi:10.1016/j.coph.2005.01.014.
- Geller, D. A., and Billiar, T. R. (1998). Molecular biology of nitric oxide synthases. *Cancer Metastasis Rev.* 17, 7–23.
- Cannon, C. P. (2011). High-density lipoprotein cholesterol as the Holy Grail. *JAMA* 306, 2153–2155. doi:10.1001/jama.2011.1687.
- Dullaart, R. P. F., Dallinga-Thie, G. M., Wolffenbuttel, B. H. R., and van Tol, A. (2007). CETP inhibition in cardiovascular risk management: a critical appraisal. *Eur. J. Clin. Invest.* 37, 90–98. doi:10.1111/j.1365-2362.2007.01756.x.

- Joy, T., and Hegele, R. A. (2008). Is raising HDL a futile strategy for atheroprotection? *Nat. Rev. Drug Discov.* 7, 143–155. doi:10.1038/nrd2489.
- Liu, S., Mistry, A., Reynolds, J. M., Lloyd, D. B., Griffor, M. C., Perry, D. A., et al. (2012). Crystal structures of cholesteryl ester transfer protein in complex with inhibitors. *J. Biol. Chem.* 287, 37321–37329. doi:10.1074/jbc.M112.380063.
- Bian, K., and Murad, F. (2003). Nitric oxide (NO) - biogenesis, regulation, and relevance to human diseases. *Front. Biosci.* 8, d264-278.
- Duncan, A. J., and Heales, S. J. R. (2005). Nitric oxide and neurological disorders. *Mol. Aspects Med.* 26, 67–96. doi:10.1016/j.mam.2004.09.004.
- Nathan, C. (2004). The moving frontier in nitric oxide-dependent signaling. *Sci. STKE* 2004, pe52. doi:10.1126/stke.2572004pe52.
- Garcin, E. D., Arvai, A. S., Rosenfeld, R. J., Kroeger, M. D., Crane, B. R., Andersson, G., et al. (2008). Anchored plasticity opens doors for selective inhibitor design in nitric oxide synthase. *Nat. Chem. Biol.* 4, 700–707. doi:10.1038/nchembio.115.
- Chemonges, S. (2014). The recognition of LpxC inhibitors as potential antibiotics could revolutionise the management of sepsis in veterinary patients if their unknown biological properties are widely evaluated in suitable animal models. *Int. J. Vet. Sci. Med.* 2, 99–102. doi:10.1016/j.ijvsm.2014.10.003.
- Tomaras, A. P., McPherson, C. J., Kuhn, M., Carifa, A., Mullins, L., George, D., et al. (2014). LpxC inhibitors as new antibacterial agents and tools for studying regulation of lipid A biosynthesis in Gram-negative pathogens. *MBio* 5, e01551-01514. doi:10.1128/mBio.01551-14.
- Whittington, D. A., Rusche, K. M., Shin, H., Fierke, C. A., and Christianson, D. W. (2003). Crystal structure of LpxC, a zinc-dependent deacetylase essential for endotoxin biosynthesis. *Proc. Natl. Acad. Sci. U.S.A.* 100, 8146–8150. doi:10.1073/pnas.1432990100.
- Cole, K. E., Gattis, S. G., Angell, H. D., Fierke, C. A., and Christianson, D. W. (2011). Structure of the metal-dependent deacetylase LpxC from *Yersinia enterocolitica* complexed with the potent inhibitor CHIR-090. *Biochemistry* 50, 258–265. doi:10.1021/bi101622a.
- Stöcker, W., and Bode, W. (1995). Structural features of a superfamily of zinc-endopeptidases: the metzincins. *Curr. Opin. Struct. Biol.* 5, 383–390.
- Wasserman, Z. R. (2005). Making a new turn in matrix metalloprotease inhibition. *Chem. Biol.* 12, 143–144. doi:10.1016/j.chembiol.2005.01.008.
- Engel, C. K., Pirard, B., Schimanski, S., Kirsch, R., Habermann, J., Klingler, O., et al. (2005). Structural basis for the highly selective inhibition of MMP-13. *Chem. Biol.* 12, 181–189. doi:10.1016/j.chembiol.2004.11.014.
